# CYP2C19\*2 and CYP2C9\*3 alleles are associated with stent thrombosis: a case–control study

Ankie M. Harmsze<sup>1,2,3\*</sup>, Jochem W. van Werkum<sup>2,4</sup>, Jurriën M. ten Berg<sup>2,4</sup>, Bastiaan Zwart<sup>2,4</sup>, Heleen J. Bouman<sup>2,4</sup>, Nicoline J. Breet<sup>2,4</sup>, Arnoud W.J. van 't Hof<sup>5</sup>, Hendrik J.T. Ruven<sup>2,6</sup>, Christian M. Hackeng<sup>2,6</sup>, Olaf H. Klungel<sup>3</sup>, Antonius de Boer<sup>3</sup>, and Vera H.M. Deneer<sup>1,2</sup>

<sup>1</sup>Department of Clinical Pharmacy, St Antonius Hospital, PO Box 2500, Nieuwegein 3430 EM, The Netherlands; <sup>2</sup>St Antonius Center for Platelet Function Research, St Antonius Hospital, Nieuwegein, The Netherlands; <sup>3</sup>Division of Pharmacoepidemiology and Pharmacotherapy, Utrecht Institute for Pharmaceutical Sciences (UIPS), Utrecht University, Utrecht, The Netherlands; <sup>4</sup>Department of Cardiology, St Antonius Hospital, Nieuwegein, The Netherlands; <sup>5</sup>Department of Cardiology, Isala Clinics, Zwolle, The Netherlands; and <sup>6</sup>Department of Clinical Chemistry, St Antonius Hospital, Nieuwegein, The Netherlands

Received 26 February 2010; revised 22 June 2010; accepted 30 July 2010; online publish-ahead-of-print 10 September 2010

See page 2974 for the editorial comment on this article (doi:10.1093/eurheartj/ehq329)

## Aims

Despite treatment with clopidogrel on top of aspirin, stent thrombosis (ST) still occurs being the most serious complication after percutaneous coronary interventions (PCIs). In this study, we aimed to determine the effect of variations in genes involved in the absorption (ABCB1 C1236T, G2677T/A, C3435T), metabolism (CYP2C19\*2 and \*3, CYP2C9\*2 and \*3, CYP3A4\*1B and CYP3A5\*3), and pharmacodynamics (P2Y1 A1622G) of clopidogrel on the occurrence of ST.

## Methods and results

The selected genetic variants were assessed in 176 subjects who developed ST while on dual antiplatelet therapy with aspirin and clopidogrel and in 420 control subjects who did not develop adverse cardiovascular events, including ST, within 1 year after stenting. The timing of the definite ST was acute in 66, subacute in 87, and late in 23 cases. The presence of the CYP2C19\*2 and CYP2C9\*3 variant alleles was significantly associated with ST (OR<sub>adj</sub>: 1.7, 95% CI: 1.0–2.6, *P* = 0.018 and OR<sub>adj</sub>: 2.4, 95% CI: 1.0–5.5, *P* = 0.043, respectively). The influence of CYP2C19\*2 (OR<sub>adj</sub>: 2.5, 95% CI: 1.1–5.5, *P* = 0.026) and CYP2C9\*3 (OR<sub>adj</sub>: 3.3, 95% CI: 1.1–9.9, *P* = 0.031) was most strongly associated with subacute ST. No significant associations of the other genetic variations and the occurrence of ST were found.

## Conclusion

Carriage of the loss-of-function alleles CYP2C19\*2 and CYP2C9\*3 increases the risk on ST after PCI.

## Keywords

Clopidogrel • Percutaneous coronary intervention • Genetic variants • Absorption • Metabolism • Stent thrombosis

## Introduction

Clopidogrel plays an important role in the prevention of atherothrombotic events in patients undergoing percutaneous coronary interventions (PCIs) with stent implantation.<sup>1</sup> Despite this treatment, a substantial number of thrombotic events still occur. The most serious thrombotic complication is stent thrombosis (ST). This acute re-occlusion of the artery causes acute myocardial infarction (MI) and is associated with substantial morbidity and mortality. The reported incidence of ST varies from 0.2 to 4.6%.<sup>2,3</sup> The pathophysiology of ST involves complex and multifactorial mechanisms, and many issues are still unresolved.<sup>4–7</sup> Heightened platelet

reactivity despite clopidogrel treatment has been associated with the occurrence of ST.<sup>8,9</sup> The magnitude of on-clopidogrel platelet reactivity is highly variable between subjects. Clinical, cellular, and genetic factors are thought to play an important role in this phenomenon.<sup>10,11</sup>

Clopidogrel is a thienopyridine that inhibits platelet activation through an irreversible blockage of the platelet adenosine diphosphate (ADP) P2Y12 receptor.<sup>12,13</sup> Clopidogrel is an inactive prodrug that requires several biotransformation steps to become active.<sup>13</sup> After intestinal absorption, which is mediated by P-glycoprotein, clopidogrel conversion to the active metabolite is mediated mainly by the hepatic cytochrome P450 system.<sup>12,13</sup>

\* Corresponding author. Tel: +31 306092612, Fax: +31 306093080, Email: a.harmsze@antoniusziekenhuis.nl

Published on behalf of the European Society of Cardiology. All rights reserved. © The Author 2010. For permissions please email: journals.permissions@oxfordjournals.org.

Variations in genes involved in the absorption, metabolism, and pharmacodynamics of clopidogrel are thought to influence the response to the drug.<sup>14–20</sup>

In addition, recent studies have demonstrated a relationship between carriage of CYP2C19 loss-of-function alleles and adverse cardiovascular events, including ST, in patients on clopidogrel treatment.<sup>19,21–26</sup> However, all these studies had a limited amount of cases with ST, with the largest number of subjects being 24.<sup>21</sup> In the present study, 176 subjects with ST were included who were all on clopidogrel treatment at the time the event occurred. The aim of the present study was to investigate whether variations in genes involved in clopidogrel absorption (ABCB1 C1236T, G2677T/A, C3435T), metabolism (CYP2C19\*2 and \*3, CYP2C9\*2 and \*3, CYP3A4\*1B and CYP3A5\*3), and the P2Y1 receptor (P2Y1 A1622G) are associated with the occurrence of ST in patients undergoing coronary stent placement who were treated with clopidogrel and aspirin.

## Methods

### Study population

All consecutive patients with an angiographically confirmed ST presenting from January 2004 to February 2007 in three high-volume centres in the Netherlands were enrolled.<sup>27</sup> Stent thrombosis was defined according to the Academic Research Consortium (ARC) 'definite' definition.<sup>28</sup> Stent thrombosis was categorized according to the time of the event as acute (occurrence within the first 24 h after the index procedure), subacute (from 24 h to 30 days), and late (from 30 days to 1 year). Patients were only selected as cases when they were still on aspirin and clopidogrel at the time of ST.

Control subjects were consecutive patients who underwent PCI with stent implantation between December 2005 and December 2006 in one of the participating centres, with no adverse cardiovascular events, including ST, during a 1-year follow-up post-PCI. All control subjects were on clopidogrel maintenance therapy and aspirin (80–100 mg) during the entire follow-up period. Of all subjects, medication records of community pharmacies were used to verify the use of clopidogrel, aspirin, proton pump inhibitors (PPIs), and calcium channel blockers (CCBs) from the time of index PCI until 1-year post-PCI. The ethnicity of the population in and around the cities of the participating centres is primarily Caucasian (>85%).<sup>29–31</sup> The study complies with the Declaration of Helsinki, the study protocol was approved by the hospital's Medical Ethics Committee, and informed consent was obtained from each patient.

### Genotyping

Genomic DNA of all control subjects and of 38 cases was isolated from EDTA blood (MagNA Pure LC DNA Isolation kit 1, MagNA Pure; Roche Diagnostics, Basel, Switzerland). Genomic DNA of the remaining 138 cases was manually extracted from saliva samples (Oragene kit, DNA Genotek, Inc., Ottawa, Ontario, Canada; Laboratory Protocol for Manual Purification of DNA from 4.0 mL of Oragene® DNA/saliva on [www.dnagenotek.com](http://www.dnagenotek.com)).

CYP2C19\*2 and \*3, CYP2C9\*2 and \*3, CYP3A4\*1B, and the ABCB1 G2677T/A and C3435T alleles were identified by real-time PCR. CYP3A5\*3, ABCB1 C1236T, and the P2Y1 A1622G alleles were identified by using restriction fragment length polymorphism. Method validation was carried out by DNA sequence analyses.

### Data analysis

The Kolmogorov–Smirnov test was used to check for normal distribution of continuous data. Continuous data, except for the time to ST, were normally distributed. Normally distributed continuous data were expressed as mean  $\pm$  standard deviation (SD). Continuous data not meeting the criteria for normal distribution were expressed as median [interquartile range (IQR)]. Comparisons between groups were made with the chi-square test for categorical variables. For continuous variables, comparisons were made with the two-sided Student's *t*-test. Chi-square tables were used to compare the observed number of each genotype with those expected for a population in Hardy–Weinberg equilibrium ( $P > 0.05$ ). The linkage disequilibrium (LD) correlation coefficient ( $r^2$ ) between each pair of variant alleles that was associated with ST was calculated with the Cubic exact solutions for the estimation of pairwise haplotype frequencies.<sup>32</sup> We assumed a dominant model for our genetic analyses. Logistic regression was used to analyse the association between the presence of variant alleles and ST and to adjust for potential confounders. Variates that have been associated with an altered response to clopidogrel or with an increased risk of adverse cardiovascular events after PCI in previous publications were selected as potential confounders. The included confounders were: age, gender, body mass index (BMI), smoking, diabetes mellitus, prior MI, the use of PPIs, the use of CCBs, acute coronary syndrome (ACS) as the indication for PCI, peri-procedural variables being stent length, stent diameter, and stent type (bare metal or drug eluting), and the use of glycoprotein IIb/IIIa antagonists during the procedure. A *P*-value of  $<0.05$  was considered statistically significant. All associations that were statistically significant were corrected for multiple testing by performing the false discovery rate test (*q*-value threshold 0.20).<sup>33</sup> Statistical analysis was performed using SPSS software (version 15.0.1 for Windows, SPSS Chicago, IL, USA).

## Results

### Characteristics of the study population and genotype

Of a total of 21 009 patients undergoing stent implantations in the participating hospitals, 437 patients presented with an angiographic confirmed ST during the inclusion period. In total, 210 patients were still on dual antiplatelet therapy at the time of ST. From these, DNA was obtained from 176 patients. In total, 176 cases and 420 control subjects were included in the study. The timing of the 'definite' ST was acute in 66 (37.5%), subacute in 87 (49.4%), and late in 23 (13.1%) subjects. The median time (IQR) for the occurrence of ST in relation to the index procedure was 3.0 (0–9) days. *Table 1* summarizes the characteristics of the cases and control subjects. There were no significant differences with regard to sex, age, diabetes mellitus, BMI, hypertension, and hypercholesterolaemia between the two groups. Cases were more frequently current smokers ( $P < 0.001$ ) than control subjects. The control group consisted of significantly more patients who had suffered from a previous MI. No significant deviations from Hardy–Weinberg equilibrium were observed for any of the genetic variants (*Table 2*). Genotype and allele frequencies of control subjects were not different from previously reported frequencies in healthy Caucasian populations.<sup>16,34</sup> As we found only one subject carrying a CYP2C19\*3 allele, we did not include this allele in our analysis.

**Table 1** Baseline characteristics

| Variable                                       | Control subjects (n = 420) | Cases (n = 176) | P-value |
|------------------------------------------------|----------------------------|-----------------|---------|
| Age (years)                                    | 62.1 ± 9.4                 | 64.1 ± 10.5     | 0.14    |
| Gender, male                                   | 334 (79.5)                 | 137 (77.8)      | 0.66    |
| BMI (kg/m <sup>2</sup> )                       | 27.4 ± 3.8                 | 27.1 ± 2.2      | 0.76    |
| Diabetes mellitus                              | 69 (16.4)                  | 31 (17.6)       | 0.55    |
| Dyslipidaemia                                  | 212 (50.5)                 | 92 (52.3)       | 0.72    |
| Hypertension                                   | 208 (49.5)                 | 82 (46.6)       | 0.53    |
| Prior MI                                       | 178 (42.4)                 | 42 (23.9)       | <0.0001 |
| Current smoking                                | 51 (12.1)                  | 39 (22.2)       | <0.0001 |
| Glycoprotein IIb/IIIa receptor antagonist use  | 39 (9.3)                   | 61 (34.7)       | <0.0001 |
| Acute coronary syndromes as indication for PCI | 103 (24.6)                 | 136 (77.3)      | <0.0001 |
| Drug eluting stent                             | 199 (47.4)                 | 55 (31.3)       | <0.0001 |
| Stent length (mm)                              | 29.6 ± 17.6                | 18.9 ± 5.7      | <0.0001 |
| Stent diameter (mm)                            | 3.1 ± 0.6                  | 3.1 ± 0.4       | 0.36    |
| Proton pump inhibitors                         | 95 (22.7)                  | 51 (29.0)       | 0.12    |
| CYP3A4-metabolized statins                     | 297 (70.7)                 | 128 (72.7)      | 0.44    |
| Calcium channel blockers                       | 120 (28.6)                 | 53 (30.1)       | 0.77    |

Data presented are mean ± SD or number of patients (percentage). P-value: Student's *t*-test for continuous variables and chi-square test for categorical variables. ST, stent thrombosis; PCI, percutaneous coronary intervention; MI, myocardial infarction; BMI, body mass index.

## Association between genotype and the occurrence of stent thrombosis

As shown in Table 2, 40.0% of the cases had at least one CYP2C19\*2 allele, compared with 29.5% of the control subjects ( $P = 0.013$ ). The CYP2C19\*2 allele was associated with ST in univariate analysis, with an OR of 1.6 (95% CI: 1.1–2.3,  $P = 0.013$ , Table 3). This association remained significant after the adjustment for confounders (OR<sub>adj</sub>: 1.7, 95% CI: 1.0–2.6,  $P = 0.018$ ). When cases were divided according to the time of ST after PCI, carriers of CYP2C19\*2 were at an approximately two-fold higher risk of developing a subacute ST (OR: 2.0, 95% CI: 1.3–3.3,  $P = 0.003$ ), which remained significant after the adjustment for confounders (OR<sub>adj</sub>: 2.5, 95% CI: 1.1–5.5,  $P = 0.026$ , Table 4). Subanalyses in cases with acute or late ST did not reveal any significant associations of genotypes with the occurrence of these types of ST (Table 4).

For CYP2C9, the carriage of the \*3 allele was associated with an increased risk of ST when compared with CYP2C9\*3 non-carriers: OR: 1.8, 95% CI: 1.1–3.0,  $P = 0.027$ ; OR<sub>adj</sub>: 2.4, 95% CI: 1.0–5.5,  $P = 0.043$ . The influence of CYP2C9\*3 was most prominent on the occurrence of subacute ST (OR: 2.2, 95% CI: 1.1–4.4,  $P = 0.024$ ; OR<sub>adj</sub>: 3.3, 95% CI: 1.1–9.9,  $P = 0.031$ ), whereas the associations of this variant allele and the occurrence of acute and late ST were not statistically significant (Table 4).

In multivariate analysis, in which besides the non-genetic covariates, both CYP2C19\*2 and CYP2C9\*3 were included as covariates, the two genetic variants were found to be independent predictors of ST (for CYP2C19\*2: OR<sub>adj</sub>: 1.7, 95% CI: 1.0–3.1,  $P = 0.040$ ; for CYP2C9\*3: OR<sub>adj</sub>: 2.5, 95% CI: 1.1–5.8,  $P = 0.035$ ).

We found no evidence of LD for the pair CYP2C19\*2–CYP2C9\*3 ( $r^2 = 0.01$ ). The distribution of CYP2C19 and CYP2C9 genotypes among cases and control subjects is shown

in Table 5. In CYP2C19\*2 non-carriers, CYP2C9\*3 was associated with an almost two-fold increased risk of ST: OR: 1.9, 95% CI: 1.0–3.4,  $P = 0.042$ , which remained statistically significant after the adjustment for confounders: OR<sub>adj</sub>: 3.0, 95% CI: 1.1–8.6,  $P = 0.037$ . Cases were more often carriers of both CYP2C19\*2 and CYP2C9\*3 alleles when compared with control subjects: 4.5 vs. 1.7% (OR: 1.9, 95% CI: 1.2–10.0,  $P = 0.029$ ; OR<sub>adj</sub>: 2.1, 95% CI: 1.3–3.5,  $P = 0.003$ ; Table 5).

No interaction between the indication for PCI [ACS vs. stable angina pectoris (SAP)] and the carriage of CYP2C19\*2 or CYP2C9\*3 was found ( $P$ -values of 0.97 and 0.18, respectively). In addition, stratified analysis according to the indication of PCI was performed. In subjects with ACS as the indication for PCI (136 cases and 103 control subjects), CYP2C19\*2 and CYP2C9\*3 both increased the risk on the occurrence of ST (OR<sub>adj</sub>: 2.0, 95% CI: 1.1–4.5,  $P = 0.032$  and OR<sub>adj</sub>: 2.9, 95% CI: 1.0–9.3,  $P = 0.039$ , respectively).

In the subgroup of subjects with SAP (40 cases and 317 control subjects), a trend towards an association for CYP2C19\*2 was found (OR: 1.7, 95% CI: 0.9–4.1,  $P = 0.076$ ), whereas for CYP2C9\*3, no association with ST (OR: 1.2, 95% CI: 0.4–6.5,  $P = 0.56$ ) was observed.

No significant associations of the other genetic variations and the occurrence of ST were found (Table 3). For all associations, the multiple testing parameter  $q$  was found to be <0.20.

## Discussion

This case–control study aimed to determine the influence of genetic variations related to the pharmacokinetics and pharmacodynamics of clopidogrel on the occurrence of ST in patients who were on clopidogrel and aspirin treatment at the time of the

**Table 2** Genotype frequencies

| SNP (allele)/dbSNP/accession number | Genotype | Frequency control subjects (%) | HWE control subjects | Frequency cases (%) |
|-------------------------------------|----------|--------------------------------|----------------------|---------------------|
| CYP2C19/G681A (*1>*2)/rs4244285     | *1/*1    | 70.5                           | 0.12                 | 60.0                |
|                                     | *1/*2    | 25.7                           |                      | 34.9                |
|                                     | *2/*2    | 3.8                            |                      | 5.1                 |
|                                     | AF       | 17.0                           |                      | 22.6                |
| CYP2C19/G636A (*1>*3)/rs4986893     | *1/*1    | 99.8                           | 0.98                 | 100                 |
|                                     | *1/*3    | 0.2                            |                      | 0                   |
|                                     | *3/*3    | 0                              |                      | 0                   |
|                                     | AF       | 0                              |                      | 0                   |
| CYP2C9/C430T (*1>*2)/rs1799853      | *1/*1    | 77.2                           | 0.66                 | 77.7                |
|                                     | *1/*2    | 21.5                           |                      | 20.0                |
|                                     | *2/*2    | 1.2                            |                      | 2.3                 |
|                                     | AF       | 12.0                           |                      | 12.3                |
| CYP2C9/A1075C (*1>*3)/rs1057910     | *1/*1    | 90.0                           | 0.99                 | 83.5                |
|                                     | *1/*3    | 9.8                            |                      | 15.3                |
|                                     | *3/*3    | 0.2                            |                      | 1.1                 |
|                                     | AF       | 5.2                            |                      | 8.6                 |
| CYP3A4/A290G (*1>*1B)/rs2740574     | *1/*1    | 91.7                           | 0.28                 | 92.6                |
|                                     | *1/*1B   | 6.7                            |                      | 7.4                 |
|                                     | *1B/*1B  | 1.6                            |                      | 0                   |
|                                     | AF       | 5.0                            |                      | 3.7                 |
| CYP3A5/A6986G (*1>*3)/rs776746      | *1/*1    | 0                              | 0.17                 | 0.6                 |
|                                     | *1/*3    | 12.7                           |                      | 11.0                |
|                                     | *3/*3    | 87.3                           |                      | 88.4                |
|                                     | AF       | 94.0                           |                      | 93.9                |
| ABCB1/C1236T/rs1128503              | CC       | 29.5                           | 0.07                 | 32.0                |
|                                     | CT       | 54.0                           |                      | 53.7                |
|                                     | TT       | 16.5                           |                      | 14.3                |
|                                     | AF       | 43.5                           |                      | 41.2                |
| ABCB1/G2677T/A/rs2032582            | GG       | 29.7                           | 0.06                 | 28.6                |
|                                     | GT+GA    | 53.8                           |                      | 56.0                |
|                                     | TT+TA+AA | 16.5                           |                      | 15.4                |
|                                     | AF       | 43.0                           |                      | 43.4                |
| ABCB1/C3435T/rs1045642              | CC       | 16.8                           | 0.12                 | 21.6                |
|                                     | CT       | 56.6                           |                      | 54.0                |
|                                     | TT       | 26.6                           |                      | 24.4                |
|                                     | AF       | 54.9                           |                      | 51.4                |
| P2Y1/A1622G/rs701265                | AA       | 72.0                           | 0.63                 | 70.1                |
|                                     | AG       | 26.0                           |                      | 29.3                |
|                                     | GG       | 1.9                            |                      | 0.6                 |
|                                     | AF       | 15.0                           |                      | 15.3                |

SNP, single nucleotide polymorphism; HWE, Hardy–Weinberg Equilibrium; AF, allele frequency. All frequencies are expressed as percentages.

event. We found that carriers of the CYP2C19\*2 and CYP2C9\*3 loss-of-function alleles were at a 1.7- and 2.4-fold increased risk of developing ST, respectively. The influence of these genetic variants was most profound on the risk of subacute ST. We found no significant associations between the other investigated genetic variants and the occurrence of ST.

Of all genotypes included in this study, CYP2C19 has been by far the most extensively investigated. After absorption, 85% of clopidogrel is metabolized into an inactive compound. The remaining

15% of clopidogrel is metabolized into 2-oxo-clopidogrel. This intermediate metabolite is then hydrolysed and generates a highly unstable active thiol (R-130964) metabolite.<sup>12,13</sup> CYP2C19 contributes in both of the two sequential metabolic steps of clopidogrel activation. Data from several studies report that carriage of the CYP2C19\*2 allele is associated with an impaired pharmacodynamic response to different dosing regimens of clopidogrel, as measured with various platelet function assays.<sup>14,15,20</sup> In two studies in healthy subjects, the carriers of CYP2C19\*2 exhibited

**Table 3** Associations of genetic variants and risk on stent thrombosis

| Carriers $\geq 1$ variant allele | Crude OR (95% CI) | P-value | Adjusted OR (95% CI) <sup>a</sup> | P-value |
|----------------------------------|-------------------|---------|-----------------------------------|---------|
| CYP2C19/G681A (*1>*2)            | 1.6 (1.1–2.3)     | 0.013   | 1.7 (1.0–2.6)                     | 0.018   |
| CYP2C19/G636A (*1>*3)            | ND                | ND      | ND                                | ND      |
| CYP2C9/A1075C (*1>*3)            | 1.8 (1.1–3.0)     | 0.027   | 2.4 (1.0–5.5)                     | 0.043   |
| CYP2C9/C430T (*1>*2)             | 1.0 (0.6–1.5)     | 0.90    | 0.6 (0.2–1.7)                     | 0.12    |
| CYP3A4/A290G (*1>*1B)            | 0.8 (0.5–1.8)     | 0.76    | 0.6 (0.3–2.0)                     | 0.45    |
| CYP3A5/A6986G (*1>*3)            | 0.2 (0.1–1.2)     | 0.99    | 0.2 (0.1–1.3)                     | 0.99    |
| ABCB1/C1236T                     | 0.9 (0.6–1.4)     | 0.74    | 0.7 (0.4–1.2)                     | 0.48    |
| ABCB1/G2677T/A                   | 1.0 (0.7–1.6)     | 0.79    | 0.9 (0.5–1.6)                     | 0.89    |
| ABCB1/C3435T                     | 0.8 (0.5–1.2)     | 0.30    | 0.6 (0.3–1.2)                     | 0.18    |
| P2Y1/A1622G                      | 1.1 (0.7–1.6)     | 0.64    | 1.2 (0.6–2.2)                     | 0.28    |

OR, odds ratio; CI, confidence interval; ND, not determined.

<sup>a</sup>Adjusted for age, gender, body mass index, smoking, diabetes mellitus, prior MI, use of PPIs, use of CCBs, use of glycoprotein IIb/IIIa receptor antagonists, stent length, type, and diameter, and ACS as indication for PCI.

**Table 4** Associations of genetic variants and risk on stent thrombosis, stratified by the timing of stent thrombosis

| Genetic variants          | Acute ST (n = 66)                                       |            | Subacute ST (n = 87)                                    |              | Late ST (n = 23)                                        |            |
|---------------------------|---------------------------------------------------------|------------|---------------------------------------------------------|--------------|---------------------------------------------------------|------------|
|                           | OR (95% CI),<br>OR <sub>adj</sub> (95% CI) <sup>a</sup> | P-value    | OR (95% CI),<br>OR <sub>adj</sub> (95% CI) <sup>a</sup> | P-value      | OR (95% CI),<br>OR <sub>adj</sub> (95% CI) <sup>a</sup> | P-value    |
| CYP2C19, G681A<br>(*1>*2) | 1.3 (0.8–2.3), 1.7 (0.8–3.5)                            | 0.34, 0.11 | 2.0 (1.3–3.3), 2.5 (1.1–5.5)                            | 0.003, 0.026 | 1.0 (0.4–2.6), 1.4 (0.6–9.5)                            | 0.92, 0.54 |
| CYP2C9, A1075C<br>(*1>*3) | 1.5 (0.7–3.1), 2.2 (0.9–6.8)                            | 0.15, 0.10 | 2.2 (1.1–4.4), 3.3 (1.1–9.9)                            | 0.024, 0.031 | 0.4 (0.06–3.1), 1.1 (0.1–12.5)                          | 0.39, 0.73 |

OR, odds ratio; CI, confidence interval; ST, stent thrombosis.

<sup>a</sup>Adjusted for age, gender, body mass index, smoking, diabetes mellitus, prior MI, use of PPIs, use of CCBs, use of glycoprotein IIb/IIIa receptor antagonists, type, length, and diameter of the stent, and ACS as indication for PCI.

**Table 5** Distribution of CYP2C19 and CYP2C9 variant alleles in control subjects and cases

| Genotype groups                                  | Control subjects<br>[n (%)] | Cases<br>[n (%)] | OR (95% CI),<br>OR <sub>adj</sub> (95% CI) <sup>*</sup> | P-value      |
|--------------------------------------------------|-----------------------------|------------------|---------------------------------------------------------|--------------|
| Subjects carrying neither CYP2C19*2 nor CYP2C9*3 | 262 (62.4)                  | 85 (48.3)        | 0.6 (0.4–0.8), 0.4 (0.2–0.7)                            | 0.002, 0.003 |
| Subjects carrying CYP2C19*2 but not CYP2C9*3     | 116 (27.6)                  | 62 (35.2)        | 1.6 (1.1–2.4), 2.1 (1.1–3.9)                            | 0.013, 0.018 |
| Subjects carrying CYP2C9*3 but not CYP2C19*2     | 35 (8.3)                    | 21 (11.9)        | 1.9 (1.0–3.4), 3.0 (1.1–8.6)                            | 0.042, 0.037 |
| Subjects carrying both CYP2C19*2 and CYP2C9*3    | 7 (1.7)                     | 8 (4.5)          | 1.9 (1.1–3.2), 2.4 (1.3–4.3)                            | 0.018, 0.004 |

Cases and control subjects are divided into four subgroups: (i) subjects carrying neither CYP2C19\*2 nor CYP2C9\*3, (ii) subjects carrying CYP2C19\*2 but not CYP2C9\*3, (iii) subjects carrying CYP2C9\*3 but not CYP2C19\*2, and (iv) subjects carrying both CYP2C19\*2 and CYP2C9\*3. Data expressed as number (%). OR, odds ratio; CI, confidence interval.

<sup>\*</sup>Adjusted for age, gender, body mass index, smoking, diabetes mellitus, prior MI, use of PPIs, use of CCBs, use of glycoprotein IIb/IIIa receptor antagonists, type, length, and diameter of the stent, and ACS as indication for PCI.

significantly lower area under the plasma concentration time curves (AUCs) and lower maximal plasma concentrations of clopidogrel's metabolites than subjects homozygous for the CYP2C19 wildtype.<sup>25,35</sup> The results of our study regarding CYP2C19\*2 are consistent with recent studies investigating the effect of CYP2C19\*2 on clinical endpoints, including ST.<sup>21–23,26</sup>

To our knowledge, this is the first study showing that the carriage of CYP2C9\*3 is associated with an increased risk of ST. The association of CYP2C9 genetic variants and ST is only explored in the study reported by Mega et al.<sup>25</sup> in which no associations of CYP2C9\*3 and ST were found. However, the number of subjects with ST was rather small (n = 18). Together with the low



allele frequency of CYP2C9\*3 (7.0–9.0% in Caucasians,<sup>34</sup> 4% in Asians, and not present in African populations<sup>36</sup>), this study was underpowered to detect the association. Our observation regarding CYP2C9\*3 is supported by the results of two studies. In patients undergoing elective PCI, CYP2C9\*3 carriers had a mean relative increase of 10% in on-clopidogrel platelet reactivity as measured with ADP-induced light transmittance aggregometry and the VerifyNow P2Y12 assay, compared with CYP2C9\*3 non-carriers.<sup>20</sup> The carriage of CYP2C9\*3 was associated with a four-fold increased risk on high on-clopidogrel platelet reactivity (HCPR). In the same study, the carriage of CYP2C19\*2 was also associated with a more than 10% mean relative increase in on-clopidogrel platelet reactivity. CYP2C19\*2 carriers had an ~3.5-fold increased risk of HCPR.<sup>20</sup> Brandt *et al.* found healthy subjects carrying the CYP2C9\*3 loss-of-function allele to have a significantly lower AUC and lower maximal plasma concentrations of clopidogrel's active metabolite when compared with non-carriers. Furthermore, they also found CYP2C9\*3 to be associated with an impaired pharmacodynamic response to a 300-mg clopidogrel loading dose.<sup>35</sup> CYP2C9 is thought to play a role in only clopidogrel's secondary metabolic step of activation.<sup>25</sup>

The other investigated genetic variant in the CYP2C9 gene, CYP2C9\*2, was not associated with the risk of ST. This is in concordance with other pharmacogenetic studies of CYP2C9-metabolized drugs, e.g. coumarins. The presence of the CYP2C9\*2 allele also has less impact on the anticoagulation effect of acenocoumarol than CYP2C9\*3.<sup>37</sup>

The influence of genetic variations is most prominent on subacute ST. However, it should be noted that subanalyses in the different groups of ST had less power due to lower number of cases in each of the ST subgroups.

No significant associations were found in patients presenting with acute ST. This observation is in line with previous findings that indicate that mechanical and procedural factors are the predominant cause of acute ST.<sup>27,38</sup> We found no associations of genetic variations on the occurrence of late ST. This phenomenon might partly be caused by the fact that only 23 patients with late ST were included in our study. Furthermore, when the time interval after the index PCI increases, it is likely that other mechanisms (e.g. late stent malapposition) might play a more prominent role. Our findings confirm recently published data from Geisler *et al.* showing no predictive value of residual platelet aggregation for the incidence of late ST. The authors concluded that other mechanisms might be involved in the development of late ST.<sup>39</sup>

Drug eluting stents (DES) are considered to be associated with the occurrence of particularly late ST. The lower percentage of cases who received DES might be caused by the fact that we observed mainly acute and subacute ST (in total 87% of the cases). These types of ST are more common with the use of bare metal stents.<sup>40</sup>

There are some limitations in this study. First, in this observational case–control study, we cannot completely exclude the possible bias by various risk factors and patients' characteristics. Nonetheless, the multivariable adjustment models confirmed the primary analyses. Second, our cases had more often ACS as the indication for PCI. Acute coronary syndrome is a known risk factor for the development of ST.<sup>6</sup> However, adjustment for this

confounder and including interaction terms did not change findings. In addition, stratified analyses showed that the genetic variants CYP2C19\*2 and CYP2C9\*3 were associated with ST in the subgroup of patients with ACS. In the subgroup consisting of patients with SAP as the indication for PCI, a trend towards a significant association for CYP2C19\*2 but no association for CYP2C9\*3 was found. As only 40 cases had SAP as the indication for PCI and the fact that CYP2C9\*3 has a low allele frequency, this subgroup was too small to detect significant associations. Finally, the cases more often received glycoprotein IIb/IIIa antagonists than the control subjects. Both in patients with ACS and SAP as the indication for PCI, the use of glycoprotein IIb/IIIa antagonists was limited to the provisional (bail-out) use at the discretion of the operator, after PCI. Nevertheless, we observed that ACS patients more often received glycoprotein IIb/IIIa antagonists than patients with SAP (29% of the patients with ACS and 10% of the patients with SAP). However, adjustment for the use of glycoprotein IIb/IIIa antagonists did not change the associations between the two genetic variants and ST. Also, in stratified analysis according to the indication of PCI, the adjustment for glycoprotein IIb/IIIa antagonists did not change findings.

Given the devastating consequences of ST, great efforts should be made to identify those patients at highest risk, who would benefit most from an alternative strategy. Specifically, the frequent presence of the CYP2C19\*2 allele, seen in ~30% of the Caucasian and 60% of the Asian population, may require an alternative strategy in the prevention of atherothrombotic complications after stent implantation.<sup>41</sup> A randomized trial in 60 patients undergoing elective PCI, reported that CYP2C19\*2 carriers had a greater platelet inhibition after a split 1200-mg clopidogrel loading dose or 150-mg clopidogrel maintenance dose than after a 600-mg loading dose and 75-mg maintenance dose, respectively. Interestingly, in patients with the CYP2C19\*1/\*1 genotype, no dose-dependent response was observed. This might indicate that subjects with a poor-response genotype may specifically benefit from a higher dose of clopidogrel.<sup>42</sup> However, large clinical trials are needed to confirm these observations.

In conclusion, we have shown that the carriage of the loss-of-function alleles CYP2C19\*2 and CYP2C9\*3 increases the risk on ST. Personalized therapy targeting patients who carry these genetic variants might help to improve the clinical outcome after stent implantation.

## Acknowledgements

The authors wish to thank Remko Harms, Richard van der Heide, Miranda Kok, Robert van der Laan, and Annette van der Vis for their work on genotyping.

**Conflict of interest:** J.W.W. reports receipt of speakers bureau fees from Accumetrics and Siemens and providing consultancy services for The Medicines Company. N.J.B. reports receipt of a speakers bureau fee from Siemens. J.M.B. reports receipt of speakers bureau fees from sanofi-aventis, Lilly and Co., Bristol-Myers Squibb, and Merck and Co., Inc. and providing consultancy services for sanofi-aventis, Eli Lilly, Schering Plough, and GlaxoSmithKline. The division of Pharmacoepidemiology and Pharmacotherapy employing authors A.M.H., O.H.K., and A.B. has received

unrestricted funding for pharmacoepidemiological research from GlaxoSmithKline, Novo Nordisk, the private-public funded Top Institute Pharma ([www.tipharma.nl](http://www.tipharma.nl), includes co-funding from universities, government, and industry), the Dutch Medicines Evaluation Board, and the Dutch Ministry of Health. The other authors reported no disclosures.

## References

- Mehta SR, Yusuf S, Peters RJ, Bertrand ME, Lewis BS, Natarajan MK, Malmberg K, Rupprecht H, Zhao F, Chrolavicius S, Copland I, Fox KA. Effects of pretreatment with clopidogrel and aspirin followed by long-term therapy in patients undergoing percutaneous coronary intervention: the PCI-CURE study. *Lancet* 2001;**358**: 527–533.
- Cutlip DE, Baim DS, Ho KK, Popma JJ, Lansky AJ, Cohen DJ, Carrozza JP Jr, Chauhan MS, Rodriguez O, Kuntz RE. Stent thrombosis in the modern era: a pooled analysis of multicenter coronary stent clinical trials. *Circulation* 2001;**103**: 1967–1971.
- Iakovou I, Schmidt T, Bonizzi E, Ge L, Sangiorgi GM, Stankovic G, Airoldi F, Chieffo A, Montorfano M, Carlino M, Michev I, Corvaja N, Briguori C, Gerckens U, Grube E, Colombo A. Incidence, predictors, and outcome of thrombosis after successful implantation of drug-eluting stents. *JAMA* 2005;**293**: 2126–2130.
- Kuchlakanti PK, Chu WW, Torguson R, Ohlmann P, Rha SW, Clavijo LC, Kim SW, Bui A, Gevorkian N, Xue Z, Smith K, Fournadjieva J, Suddath WO, Satler LF, Pichard AD, Kent KM, Waksman R. Correlates and long-term outcomes of angiographically proven stent thrombosis with sirolimus- and paclitaxel-eluting stents. *Circulation* 2006;**113**:1108–1113.
- Daemen J, Wenaweser P, Tsuchida K, Abrecht L, Vaina S, Morger C, Kukreja N, Juni P, Sianos G, Hellige G, van Domburg RT, Hess OM, Boersma E, Meier B, Windecker S, Serruys PW. Early and late coronary stent thrombosis of sirolimus-eluting and paclitaxel-eluting stents in routine clinical practice: data from a large two-institution cohort study. *Lancet* 2007;**369**:667–678.
- Smit JJ, van't Hof AW, de Boer MJ, Hoorntje JC, Dambrink JH, Gosselink AT, Ottervanger JP, Kolkman JJ, Suryapranata H. Incidence and predictors of subacute thrombosis in patients undergoing primary angioplasty for an acute myocardial infarction. *Thromb Haemost* 2006;**96**:190–195.
- van Werkum JW, Heestermaas AA, Zomer AC, Kelder JC, Suttrop MJ, Rensing BJ, Koolen JJ, Brueren BR, Dambrink JH, Hautvast RW, Verheugt FW, ten Berg JM. Predictors of coronary stent thrombosis: the Dutch Stent Thrombosis Registry. *J Am Coll Cardiol* 2009;**53**:1399–1409.
- Sibbing D, Braun S, Morath T, Mehilli J, Vogt W, Schomig A, Kastrati A, von Beckerath N. Platelet reactivity after clopidogrel treatment assessed with point-of-care analysis and early drug-eluting stent thrombosis. *J Am Coll Cardiol* 2009;**53**:849–856.
- Buonamici P, Marcucci R, Migliorini A, Gensini GF, Santini A, Panizza R, Moschi G, Gori AM, Abbate R, Antoniucci D. Impact of platelet reactivity after clopidogrel administration on drug-eluting stent thrombosis. *J Am Coll Cardiol* 2007;**49**: 2312–2317.
- Angiolillo DJ, Fernandez-Ortiz A, Bernardo E, Alfonso F, Macaya C, Bass TA, Costa MA. Variability in individual responsiveness to clopidogrel: clinical implications, management, and future perspectives. *J Am Coll Cardiol* 2007;**49**: 1505–1516.
- Kuliczkowski W, Witkowski A, Polonski L, Watala C, Filipiak K, Budaj A, Golanski J, Sitkiewicz D, Pregowski J, Gorski J, Zembala M, Opolski G, Huber K, Arnesen H, Kristensen SD, De Caterina R. Interindividual variability in the response to oral antiplatelet drugs: a position paper of the Working Group on antiplatelet drugs resistance appointed by the Section of Cardiovascular Interventions of the Polish Cardiac Society, endorsed by the Working Group on Thrombosis of the European Society of Cardiology. *Eur Heart J* 2009;**30**: 426–435.
- Pereillo JM, Maftouh M, Andrieu A, Uzabiaga MF, Fedeli O, Savi P, Pascal M, Herbert JM, Maffrand JP, Picard C. Structure and stereochemistry of the active metabolite of clopidogrel. *Drug Metab Dispos* 2002;**30**:1288–1295.
- Savi P, Pereillo JM, Uzabiaga MF, Combalbert J, Picard C, Maffrand JP, Pascal M, Herbert JM. Identification and biological activity of the active metabolite of clopidogrel. *Thromb Haemost* 2000;**84**:891–896.
- Giusti B, Gori AM, Marcucci R, Saracini C, Sestini I, Panizza R, Valente S, Antoniucci D, Abbate R, Gensini GF. Cytochrome P450 2C19 loss-of-function polymorphism, but not CYP3A4 IVS10 + 12G/A and P2Y12 T744C polymorphisms, is associated with response variability to dual antiplatelet treatment in high-risk vascular patients. *Pharmacogenet Genomics* 2007;**17**:1057–1064.
- Hulot JS, Bura A, Villard E, Azizi M, Remones V, Goyenvallé C, Aiach M, Lechat P, Gaussem P. Cytochrome P450 2C19 loss-of-function polymorphism is a major determinant of clopidogrel responsiveness in healthy subjects. *Blood* 2006;**108**: 2244–2247.
- Hetherington SL, Singh RK, Lodwick D, Thompson JR, Goodall AH, Samani NJ. Dimorphism in the P2Y1 ADP receptor gene is associated with increased platelet activation response to ADP. *Arterioscler Thromb Vasc Biol* 2005;**25**:252–257.
- Angiolillo DJ, Fernandez-Ortiz A, Bernardo E, Ramirez C, Cavallari U, Trabetti E, Sabate M, Hernandez R, Moreno R, Escaned J, Alfonso F, Banuelos C, Costa MA, Bass TA, Pignatti PF, Macaya C. Contribution of gene sequence variations of the hepatic cytochrome P450 3A4 enzyme to variability in individual responsiveness to clopidogrel. *Arterioscler Thromb Vasc Biol* 2006;**26**:1895–1900.
- Suh JW, Koo BK, Zhang SY, Park KW, Cho JY, Jang JJ, Lee DS, Sohn DW, Lee MM, Kim HS. Increased risk of atherothrombotic events associated with cytochrome P450 3A5 polymorphism in patients taking clopidogrel. *CMAJ* 2006;**174**: 1715–1722.
- Trenk D, Hochholzer W, Fromm MF, Chialda LE, Pahl A, Valina CM, Stratz C, Schmiebusch P, Bestehorn HP, Buttner HJ, Neumann FJ. Cytochrome P450 2C19 681G > A polymorphism and high on-clopidogrel platelet reactivity associated with adverse 1-year clinical outcome of elective percutaneous coronary intervention with drug-eluting or bare-metal stents. *J Am Coll Cardiol* 2008;**51**: 1925–1934.
- Harmsze A, van Werkum JW, Bouman HJ, Ruven HJ, Breet NJ, Ten Berg JM, Hackeng CM, Tjoeng MM, Klungel OH, de Boer A, Deneer VH. Besides CYP2C19\*2, the variant allele CYP2C9\*3 is associated with higher on-clopidogrel platelet reactivity in patients on dual antiplatelet therapy undergoing elective coronary stent implantation. *Pharmacogenet Genomics* 2010;**20**:18–25.
- Giusti B, Gori AM, Marcucci R, Saracini C, Sestini I, Panizza R, Buonamici P, Antoniucci D, Abbate R, Gensini GF. Relation of cytochrome P450 2C19 loss-of-function polymorphism to occurrence of drug-eluting coronary stent thrombosis. *Am J Cardiol* 2009;**103**:806–811.
- Collet JP, Hulot JS, Pena A, Villard E, Esteve JB, Silvain J, Payot L, Brugier D, Cayla G, Beygui F, Bensimon G, Funck-Brentano C, Montalescot G. Cytochrome P450 2C19 polymorphism in young patients treated with clopidogrel after myocardial infarction: a cohort study. *Lancet* 2009;**373**:309–317.
- Simon T, Verstuylt C, Mary-Krause M, Quteineh L, Drouet E, Meneveau N, Steg PG, Ferrieres J, Danchin N, Becquemont L. Genetic determinants of response to clopidogrel and cardiovascular events. *N Engl J Med* 2009;**360**: 363–75.
- Shuldiner AR, O'Connell JR, Bliden KP, Gandhi A, Ryan K, Horenstein RB, Dancott CM, Pakyz R, Tantry US, Gibson G, Pollin TI, Post W, Parsa A, Mitchell BD, Faraday N, Herzog W, Gurbel PA. Association of cytochrome P450 2C19 genotype with the antiplatelet effect and clinical efficacy of clopidogrel therapy. *JAMA* 2009;**302**:849–857.
- Mega JL, Close SL, Wiviott SD, Shen L, Hockett RD, Brandt JT, Walker JR, Antman EM, Macias W, Braunwald E, Sabatine MS. Cytochrome p-450 polymorphisms and response to clopidogrel. *N Engl J Med* 2009;**360**:354–362.
- Sibbing D, Stegherr J, Latz W, Koch W, Mehilli J, Dorrtler K, Morath T, Schomig A, Kastrati A, von Beckerath N. Cytochrome P450 2C19 loss-of-function polymorphism and stent thrombosis following percutaneous coronary intervention. *Eur Heart J* 2009;**30**:916–22.
- van Werkum JW, Heestermaas AA, de Korte FI, Kelder JC, Suttrop MJ, Rensing BJ, Zwart B, Brueren BR, Koolen JJ, Dambrink JH, van't Hof AW, Verheugt FW, ten Berg JM. Long-term clinical outcome after a first angiographically confirmed coronary stent thrombosis: an analysis of 431 cases. *Circulation* 2009;**119**:828–834.
- Cutlip DE, Windecker S, Mehran R, Boam A, Cohen DJ, van Es GA, Steg PG, Morel MA, Mauri L, Vranckx P, McFadden E, Lansky A, Hamon M, Krucoff MW, Serruys PW. Clinical end points in coronary stent trials: a case for standardized definitions. *Circulation* 2007;**115**:2344–2351.
- Facts and figures Zwolle [in Dutch]. <http://zwolle.buurtonitor.nl/> (20 February 2010).
- Centraal Bureau voor de Statistiek. *Utrecht Province: Facts and Figures 2007 [in Dutch]*. The Hague, the Netherlands: Centraal Bureau voor de Statistiek; 2008. ISBN: 978-90-357-1579-0.
- Cox S, Rijkers M, Westerlaken J, Hoogendijk-van Nunen C. *Brabant and Brabant Citizens [in Dutch]*. Tilburg, the Netherlands: PON; 2009. ISBN: 9789050494540.
- Gaunt TR, Rodriguez S, Day IN. Cubic exact solutions for the estimation of pairwise haplotype frequencies: implications for linkage disequilibrium analyses and a web tool 'CubeX'. *BMC Bioinformatics* 2007;**8**:428.
- Benjamini Y, Hochberg Y. Controlling the false discovery rate: a practical and powerful approach to multiple testing. *J R Stat Soc Ser B* 1995;**57**:289–300.
- Bosch TM, Doodeman VD, Smits PH, Meijerman I, Schellens JH, Beijnen JH. Pharmacogenetic screening for polymorphisms in drug-metabolizing enzymes and drug transporters in a Dutch population. *Mol Diagn Ther* 2006;**10**:175–185.
- Brandt JT, Close SL, Itruria SJ, Payne CD, Farid NA, Ernest CS 2nd, Lachno DR, Salazar D, Winters KJ. Common polymorphisms of CYP2C19 and CYP2C9 affect

- the pharmacokinetic and pharmacodynamic response to clopidogrel but not prasugrel. *J Thromb Haemost* 2007;**5**:2429–2436.
36. Frazer KA, Ballinger DG, Cox DR, Hinds DA, Stuve LL, Gibbs RA, Belmont JW, Boudreau A, Hardenbol P, Leal SM, Pasternak S, Wheeler DA, Willis TD, Yu F, Yang H, Zeng C, Gao Y, Hu H, Hu W, Li C, Lin W, Liu S, Pan H, Tang X, Wang J, Wang W, Yu J, Zhang B, Zhang Q, Zhao H, Zhou J, Gabriel SB, Barry R, Blumenstiel B, Camargo A, Defelice M, Faggart M, Goyette M, Gupta S, Moore J, Nguyen H, Onofrio RC, Parkin M, Roy J, Stahl E, Winchester E, Ziaugra L, Altshuler D, Shen Y, Yao Z, Huang W, Chu X, He Y, Jin L, Liu Y, Sun W, Wang H, Wang Y, Xiong X, Xu L, Wayne MM, Tsui SK, Xue H, Wong JT, Galver LM, Fan JB, Gunderson K, Murray SS, Oliphant AR, Chee MS, Montpetit A, Chagnon F, Ferretti V, Leboeuf M, Olivier JF, Phillips MS, Roumy S, Sallee C, Verner A, Hudson TJ, Kwok PY, Cai D, Koboldt DC, Miller RD, Pawlikowska L, Taillon-Miller P, Xiao M, Tsui LC, Mak W, Song YQ, Tam PK, Nakamura Y, Kawaguchi T, Kitamoto T, Morizono T, Nagashima A, Ohnishi Y, Sekine A, Tanaka T, Tsunoda T, Deloukas P, Bird CP, Delgado M, Dermitzakis ET, Gwilliam R, Hunt S, Morrison J, Powell D, Stranger BE, Whittaker P, Bentley DR, Daly MJ, de Bakker PI, Barrett J, Chretien YR, Maller J, McCarrroll S, Patterson N, Pe'er I, Price A, Purcell S, Richter DJ, Sabeti P, Saxena R, Schaffner SF, Sham PC, Varily P, Stein LD, Krishnan L, Smith AV, Tello-Ruiz MK, Thorisson GA, Chakravarti A, Chen PE, Cutler DJ, Kashuk CS, Lin S, Abecasis GR, Guan W, Li Y, Munro HM, Qin ZS, Thomas DJ, McVean G, Auton A, Bottolo L, Cardin N, Eyheramendy S, Freeman C, Marchini J, Myers S, Spencer C, Stephens M, Donnelly P, Cardon LR, Clarke G, Evans DM, Morris AP, Weir BS, Mullikin JC, Sherry ST, Feolo M, Skol A, Zhang H, Matsuda I, Fukushima Y, Macer DR, Suda E, Rotimi CN, Adebamowo CA, Ajayi I, Aniagwu T, Marshall PA, Nkwodimmah C, Royal CD, Leppert MF, Dixon M, Peiffer A, Qiu R, Kent A, Kato K, Niikawa N, Adewole IF, Knoppers BM, Foster MW, Clayton EW, Watkin J, Muzny D, Nazareth L, Sodergren E, Weinstock GM, Yakub I, Birren BW, Wilson RK, Fulton LL, Rogers J, Burton J, Carter NP, Clee CM, Griffiths M, Jones MC, McLay K, Plumb RW, Ross MT, Sims SK, Willey DL, Chen Z, Han H, Kang L, Godbout M, Wallenburg JC, L'Archeveque P, Bellemare G, Saeki K, An D, Fu H, Li Q, Wang Z, Wang R, Holden AL, Brooks LD, McEwen JE, Guyer MS, Wang VO, Peterson JL, Shi M, Spiegel J, Sung LM, Zacharia LF, Collins FS, Kennedy K, Jamieson R, Stewart J. A second generation human haplotype map of over 3.1 million SNPs. *Nature* 2007;**449**:851–861.
  37. Schalekamp T, van Geest-Daalderop JH, de Vries-Goldschmeding H, Conemans J, Bernsen Mj M, de Boer A. Acenocoumarol stabilization is delayed in CYP2C93 carriers. *Clin Pharmacol Ther* 2004;**75**:394–402.
  38. Roy P, Torguson R, Okabe T, Pinto Slottow TL, Steinberg DH, Smith K, Xue Z, Satler LF, Pichard AD, Waksman R. Angiographic and procedural correlates of stent thrombosis after intracoronary implantation of drug-eluting stents. *J Interv Cardiol* 2007;**20**:307–313.
  39. Geisler T, Zurn C, Simonenko R, Rapin M, Kraibooj H, Kiliyas A, Bigalke B, Stellos K, Schwab M, May AE, Herdeg C, Gawaz M. Early but not late stent thrombosis is influenced by residual platelet aggregation in patients undergoing coronary interventions. *Eur Heart J* 2010;**31**:59–66.
  40. Kaiser C, Kaiser C, Brunner-La Rocca HP, Buser PT, Nietlispach F, Leibundgut G, Bader F, Pfisterer M. Long-term clinical outcome after Implantation of drug-eluting compared to bare-metal stents in a real world population: three-year results of the BASKET trial. *JACC Cardiovasc Interv* 2008;**1**:B19.
  41. Desta Z, Zhao X, Shin JG, Flockhart DA. Clinical significance of the cytochrome P450 2C19 genetic polymorphism. *Clin Pharmacokinet* 2002;**41**:913–958.
  42. Gladding P, Webster M, Zeng I, Farrell H, Stewart J, Ruygrok P, Ormiston J, El-Jack S, Armstrong G, Kay P, Scott D, Gunes A, Dahl ML. The antiplatelet effect of higher loading and maintenance dose regimens of clopidogrel: the PRINC (Plavix Response in Coronary Intervention) trial. *JACC Cardiovasc Interv* 2008;**1**:612–619.
